# Supplementary material
Source: ML conference proceedings conference paper supplement (https://proceedings.neurips.cc/paper_files/paper/2021/hash/cf866614b6b18cda13fe699a3a65661b-Abstract.html)
Supplement: Supplementary file 1 [file cf866614b6b18cda13fe699a3a65661b-Supplemental.pdf]

---

# Neural Human Performer: Learning Generalizable Radiance Fields for Human Performance Rendering

---

Youngjoong Kwon<sup>1</sup>, Dahun Kim<sup>2</sup>, Duygu Ceylan<sup>3</sup>, Henry Fuchs<sup>1</sup>

<sup>1</sup>University of North Carolina at Chapel Hill. <sup>2</sup>KAIST. <sup>3</sup>Adobe Research.

{youngjoong,fuchs}@cs.unc.edu {mcahny}@kaist.ac.kr {ceylan}@adobe.com

## A Video results

Video results on the free-viewpoint rendering and 3D reconstruction with the ZJU-MoCap and AIST datasets can be found at <https://youngjoongunc.github.io/nhp>.

## B Reproducibility

### B.1 Implementation details.

We describe the implementation details in the interest of reproducibility. Note that due to the high computing cost, we did not spend significant effort to tune the architecture or training procedure, and it is possible that variations can perform better, or that smaller models may suffice. Code will be made public upon publication.

**Image feature extractor.** As briefly discussed in the main paper, we use an ImageNet-pretrained ResNet18 backbone to extract a feature pyramid. For an image of shape  $H \times W$ , we take the multi-scale feature maps of shapes

$$\{64 \times H/2 \times W/2, 64 \times H/4 \times W/4, 128 \times H/8 \times W/8, 256 \times H/16 \times W/16\}.$$

These feature maps are bilinearly upsampled to the highest resolution *i.e.*,  $H/2 \times W/2$ , and concatenated into a shape  $512 \times H/2 \times W/2$ .

**Temporal transformer.** The temporal Transformer is used in construction of time-augmented skeletal features in Section 3.2 of the manuscript. The overview of the attention between the skeletal feature at  $t$  and skeletal *memory* features is illustrated in Fig. 1. All the  $L$  vertices are processed batch-wise, where the attention is computed for each vertex.  $d$  is set to 64.

**Sampling of time-augmented skeletal feature w.r.t. a query point  $\mathbf{x}$ .** When we are given a query point  $\mathbf{x}$  in 3D space, we sample the corresponding feature at  $\mathbf{x}$ 's 3D location,  $s'_{1:C,t}{}^{\mathbf{x}} \in \mathbb{R}^{C \times d}$ , from the previously constructed time-augmented skeletal features  $s'_{1:C,t} \in \mathbb{R}^{L \times C \times d}$ . Inspired by [11, 9, 8, 7], we adopt the SparseConvNet [6] to perform such sampling, whose architecture is described in Table 1. First, we compute the 3D bounding box of the human body based on the SMPL parameters, and divide the 3D box into small voxels of size of  $5mm \times 5mm \times 5mm$ , resulting in a  $D' \times H' \times W'$  (depth, height, width) volume. The SparseConvNet consists in 3D sparse convolutions to process the input volume, diffusing the skeletal features into the nearby 3D space. We resize and concatenate the multi-scale outputs from the 5, 9, 13, 17-th layers as the output feature  $\in \mathbb{R}^{\frac{D'}{16} \times \frac{H'}{16} \times \frac{W'}{16} \times 384}$ . Since the diffusion of the skeletal feature should not be affected by the human position and orientation in the world coordinate system, we transform the skeletal feature locations to the SMPL coordinate system. Then, the query location  $\mathbf{x}$  is also transformed to the SMPL coordinate system, and the corresponding skeletal feature  $s'_{1:C,t}{}^{\mathbf{x}} \in \mathbb{R}^{C \times 384}$  is sampled via trilinear

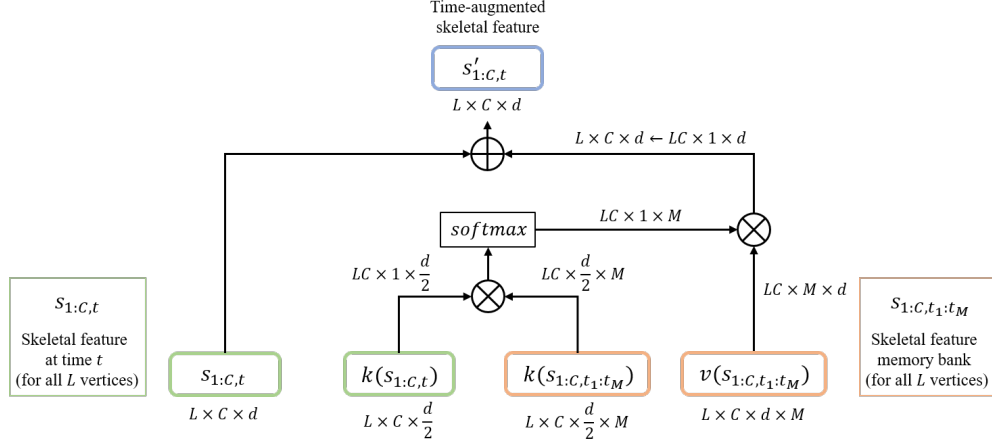

Figure 1: Overview of temporal Transformer’s attention between the skeletal features at  $t$  and skeletal memory features.

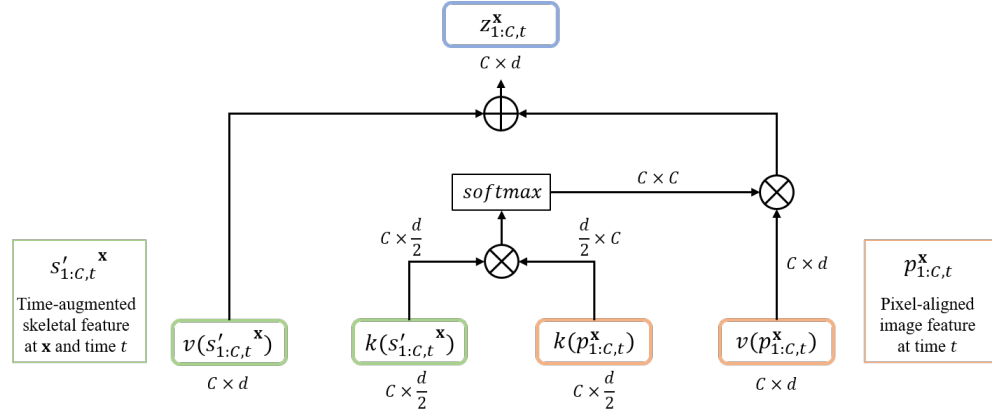

Figure 2: Overview of multi-view Transformer’s cross-attention between the sampled time-augmented skeletal features and time-specific pixel-aligned feature at  $t$ .

interpolation, and a fully-connected layer reduces the channel-size to 128. The resulting skeletal feature  $s'_{1:C,t}^x \in \mathbb{R}^{C \times 128}$  is fed into the following multi-view transformer.

**Multi-view transformer.** The sampled time-augmented skeletal feature  $s'_{1:C,t}^x$  is fed into the proposed multi-view transformer to obtain our *meta-time* and *meta-view* representation of the query point  $x$ , which is explained in Section 3.3 of the manuscript. The overview of the cross-attention between the sampled time-augmented skeletal features and time-specific pixel-aligned features is illustrated in Fig. 2.  $d$  is set as 128.

**NeRF network.** The NeRF network takes the final representation from above  $z_{1:C,t}^x$  as input and predicts density  $\sigma_t^x$  and color  $rgb_t^x$ . It consists of the fully-connected layers as illustrated in Fig. 3.

**Query point sampling details.** We first compute the 3D bounding box of the human subject from the corresponding SMPL vertice coordinates. Since there is a gap between the exact human subject geometry and the SMPL model, we enlarge the side length of the bounding box by 2.5% and this becomes the query point sampling bounds. We sample 1024 rays, and 64 points are sampled per ray for the training. For the inference, 64 points are sampled along each ray.

|       | Layer Description                                                               | Output Dim.                                  |
|-------|---------------------------------------------------------------------------------|----------------------------------------------|
|       | Input volume                                                                    | $D' \times H' \times W' \times 64$           |
| 1-2   | $(3 \times 3 \times 3 \text{ conv, } 64 \text{ features, stride } 1) \times 2$  | $D' \times H' \times W' \times 64$           |
| 3     | $(3 \times 3 \times 3 \text{ conv, } 64 \text{ features, stride } 2)$           | $D'/2 \times H'/2 \times W'/2 \times 64$     |
| 4-5   | $(3 \times 3 \times 3 \text{ conv, } 64 \text{ features, stride } 1) \times 2$  | $D'/2 \times H'/2 \times W'/2 \times 64$     |
| 6     | $(3 \times 3 \times 3 \text{ conv, } 64 \text{ features, stride } 2)$           | $D'/4 \times H'/4 \times W'/4 \times 64$     |
| 7-9   | $(3 \times 3 \times 3 \text{ conv, } 64 \text{ features, stride } 1) \times 3$  | $D'/4 \times H'/4 \times W'/4 \times 128$    |
| 10    | $(3 \times 3 \times 3 \text{ conv, } 128 \text{ features, stride } 2)$          | $D'/8 \times H'/8 \times W'/8 \times 128$    |
| 11-13 | $(3 \times 3 \times 3 \text{ conv, } 128 \text{ features, stride } 1) \times 3$ | $D'/8 \times H'/8 \times W'/8 \times 128$    |
| 14    | $(3 \times 3 \times 3 \text{ conv, } 128 \text{ features, stride } 2)$          | $D'/16 \times H'/16 \times W'/16 \times 128$ |
| 15-17 | $(3 \times 3 \times 3 \text{ conv, } 128 \text{ features, stride } 1) \times 3$ | $D'/16 \times H'/16 \times W'/16 \times 128$ |
|       | Resize & Concat. outputs of layer 5, 9, 13, and 17                              | $D'/16 \times H'/16 \times W'/16 \times 384$ |

Table 1: **Architecture of SparseConvNet.** Each layer consists of sparse convolution, batch normalization and ReLU.

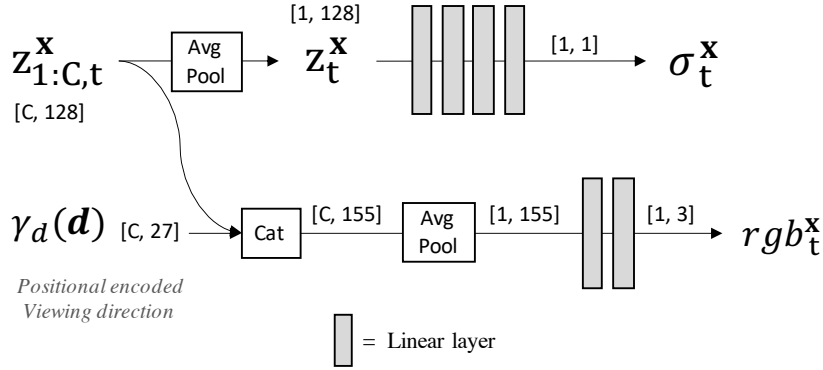

Figure 3: **Overview of NeRF architecture.**

## C Datasets

We discuss the additional details about the datasets used, including the train/test splits and license information. Note that both the ZJU-Mocap and AIST datasets do not contain any personally identifiable information or offensive content.

### C.1 ZJU-MoCap

We use the  $512 \times 512$  videos for the training and testing following the original Neural Body [7]. ZJU-Mocap provides 10 human subjects, and we reserved 7 for the training and 3 for testing on unseen identities. As mentioned in the main paper, we experiment with 5 independent runs with random train/test splits. For the qualitative results, we used subject 387, 393, 394 for the testing. ZJU-Mocap provides SMPL parameters obtained using EasyMocap<sup>1</sup> [2, 7, 3, 1] and foreground mask extracted using PGN [4]. ZJU-Mocap is the public dataset that is only meant for the research purposes as stated in their GitHub page.

### C.2 AIST

The original AIST dataset provides 60 fps videos with  $1080 \times 1920$  resolutions [10] with corresponding SMPL parameters [5] obtained using AIST++ API<sup>2</sup>. AIST dataset does not provide foreground mask, so we obtained the foreground mask using PGN [4]. Since most part of the images are background, we center-crop the video to  $800 \times 800$  sizes. During the training and evaluation, we resize the center-cropped video to  $512 \times 512$ . AIST contains 30 human subjects. We split the train and testing sets based on different subjects, which also makes sure the human motions in the train (20

<sup>1</sup><https://github.com/zju3dv/EasyMocap>

<sup>2</sup>[https://github.com/google/aistplusplus\\_api](https://github.com/google/aistplusplus_api)

identities) and testing sets (10 identities) have no overlap. AIST videos are public dataset only for the research purposes. The annotations of the AIST dataset is also public for research purposes and it is licensed by Google LLC CC-BY-4.0 license.

## References

- [1] Junting Dong, Qi Fang, Wen Jiang, Yurou Yang, Hujun Bao, and Xiaowei Zhou. Fast and robust multi-person 3d pose estimation and tracking from multiple views. In *T-PAMI*, 2021.
- [2] Junting Dong, Qing Shuai, Yuanqing Zhang, Xian Liu, Xiaowei Zhou, and Hujun Bao. Motion capture from internet videos. In *European Conference on Computer Vision*, pages 210–227. Springer, 2020.
- [3] Qi Fang, Qing Shuai, Junting Dong, Hujun Bao, and Xiaowei Zhou. Reconstructing 3d human pose by watching humans in the mirror. In *CVPR*, 2021.
- [4] Ke Gong, Xiaodan Liang, Yicheng Li, Yimin Chen, Ming Yang, and Liang Lin. Instance-level human parsing via part grouping network. In *Proceedings of the European Conference on Computer Vision (ECCV)*, pages 770–785, 2018.
- [5] Ruilong Li, Shan Yang, David A Ross, and Angjoo Kanazawa. Ai choreographer: Music conditioned 3d dance generation with aist++. In *International Conference on Computer Vision*, 2021.
- [6] Baoyuan Liu, Min Wang, Hassan Foroosh, Marshall Tappen, and Marianna Pensky. Sparse convolutional neural networks. In *Proceedings of the IEEE conference on computer vision and pattern recognition*, pages 806–814, 2015.
- [7] Sida Peng, Yuanqing Zhang, Yinghao Xu, Qianqian Wang, Qing Shuai, Hujun Bao, and Xiaowei Zhou. Neural body: Implicit neural representations with structured latent codes for novel view synthesis of dynamic humans. In *CVPR*, 2021.
- [8] Songyou Peng, Michael Niemeyer, Lars Mescheder, Marc Pollefeys, and Andreas Geiger. Convolutional occupancy networks. *arXiv preprint arXiv:2003.04618*, 2, 2020.
- [9] Shaoshuai Shi, Chaoxu Guo, Li Jiang, Zhe Wang, Jianping Shi, Xiaogang Wang, and Hongsheng Li. Pv-rcnn: Point-voxel feature set abstraction for 3d object detection. In *Proceedings of the IEEE/CVF Conference on Computer Vision and Pattern Recognition*, pages 10529–10538, 2020.
- [10] Shuhei Tsuchida, Satoru Fukayama, Masahiro Hamasaki, and Masataka Goto. Aist dance video database: Multi-genre, multi-dancer, and multi-camera database for dance information processing. In *ISMIR*, pages 501–510, 2019.
- [11] Yan Yan, Yuxing Mao, and Bo Li. Second: Sparsely embedded convolutional detection. *Sensors*, 18(10):3337, 2018.
